# Supplementary material for: Metabolomic Analysis Reveals the Effect of Insecticide Chlorpyrifos on Rice Plant Metabolism
Source: MDPI journal article supplement (doi:10.3390/metabo12121289), 2022-12-19
Supplement: s1 [file s1]

## Support information

Table S1 Information of MS peaks identified.

| Time<br>(min) | Average Mz | Mz<br>Types        | Metabolite                                  | Class         | Intensity |           |           |           |
|---------------|------------|--------------------|---------------------------------------------|---------------|-----------|-----------|-----------|-----------|
|               |            |                    |                                             |               | CK        | Low       | Middle    | High      |
| 0.668         | 146.1652   | [M+H] <sup>+</sup> | Spermidine <sup>a</sup>                     | Alkaloids     | 1.11E+03  | 3.87E+02* | 1.23E+03  | 9.17E+02  |
| 0.729         | 191.0194   | [M-H] <sup>-</sup> | Citric acid <sup>a</sup>                    | Organic acids | 1.16E+06  | 1.30E+06* | 1.05E+06* | 1.19E+06  |
| 0.740         | 166.9731   | [M-H] <sup>-</sup> | Phosphoenolpyruvic acid                     | Organic acids | 6.59E+04  | 6.69E+04  | 8.70E+04* | 9.02E+04* |
| 0.744         | 131.1282   | [M+H] <sup>+</sup> | Agmatine                                    | Others        | 1.13E+03  | 1.29E+03  | 1.28E+03  | 9.34E+02* |
| 0.761         | 133.0151   | [M-H] <sup>-</sup> | Malic acid <sup>a</sup>                     | Organic acids | 5.98E+05  | 5.82E+05  | 7.14E+05* | 6.50E+05* |
| 0.761         | 96.9609    | [M-H] <sup>-</sup> | Phosphoric acid                             | Others        | 1.70E+07  | 1.37E+07* | 1.59E+07* | 1.58E+07* |
| 0.770         | 185.0098   | [M-H] <sup>-</sup> | 2-Phosphoglycerate <sup>a</sup>             | Others        | 2.77E+04  | 3.10E+04* | 3.48E+04* | 3.22E+04  |
| 0.783         | 259.0214   | [M-H] <sup>-</sup> | D-Glucose 6-phosphate <sup>a</sup>          | Sugars        | 1.40E+05  | 1.64E+05* | 1.59E+05* | 1.48E+05* |
| 0.787         | 117.0189   | [M-H] <sup>-</sup> | Succinic acid <sup>a</sup>                  | Organic acids | 1.20E+04  | 1.15E+04  | 9.11E+03* | 1.09E+04  |
| 0.792         | 147.0299   | [M-H] <sup>-</sup> | Citramalic acid                             | Organic acids | 4.16E+03  | 4.62E+03* | 3.26E+03* | 4.79E+03* |
| 0.796         | 132.0308   | [M-H] <sup>-</sup> | Aspartate <sup>a</sup>                      | Amino acids   | 3.14E+04  | 3.12E+04  | 3.41E+04* | 2.74E+04* |
| 0.797         | 188.0554   | [M-H] <sup>-</sup> | N-acetyl-DL-glutamic acid                   | Amino acids   | 2.07E+03  | 1.59E+03* | 1.39E+03* | 1.70E+03* |
| 0.799         | 191.0553   | [M-H] <sup>-</sup> | Quinic acid <sup>a</sup>                    | Organic acids | 5.63E+05  | 7.87E+05* | 9.95E+05* | 8.95E+05* |
| 0.810         | 565.0465   | [M-H] <sup>-</sup> | Uridine 5'-diphospho-D-glucose <sup>a</sup> | Nucleosides   | 1.13E+04  | 1.21E+04  | 1.16E+04  | 1.24E+04* |
| 0.831         | 175.1173   | [M+H] <sup>+</sup> | Arginine <sup>a</sup>                       | Amino acids   | 8.98E+02  | 1.58E+03* | 1.40E+03* | 1.35E+03* |
| 0.860         | 131.0460   | [M-H] <sup>-</sup> | Methylsuccinic acid <sup>a</sup>            | Organic acids | 4.57E+03  | 3.09E+03* | 1.58E+03* | 2.94E+03* |
| 0.861         | 104.1058   | [M] <sup>+</sup>   | Choline <sup>a</sup>                        | Nucleosides   | 7.91E+04  | 7.82E+04  | 7.05E+04* | 7.21E+04  |

|       |              |                          |                               |                 |              |               |               |               |
|-------|--------------|--------------------------|-------------------------------|-----------------|--------------|---------------|---------------|---------------|
| 0.861 | 104.07<br>22 | [M+H]<br>+               | N,N-dimethylglycine           | Amino<br>acids  | 7.69<br>E+04 | 7.09E<br>+04  | 6.74E<br>+04* | 6.73E<br>+04* |
| 0.886 | 130.04<br>75 | [M+H]<br>+               | L-5-oxoproline <sup>a</sup>   | Amino<br>acids  | 3.66<br>E+04 | 3.79E<br>+04  | 3.42E<br>+04  | 2.54E<br>+04* |
| 0.893 | 148.05<br>86 | [M+H]<br>+               | Glutamic acid <sup>a</sup>    | Amino<br>acids  | 3.38<br>E+03 | 3.46E<br>+03  | 3.29E<br>+03  | 2.82E<br>+03* |
| 0.901 | 156.07<br>39 | [M+H]<br>+               | Histidine <sup>a</sup>        | Amino<br>acids  | 1.40<br>E+03 | 1.27E<br>+03  | 1.82E<br>+03* | 1.60E<br>+03  |
| 0.964 | 138.05<br>39 | [M+H]<br>+               | Trigonelline <sup>a</sup>     | Alkaloi<br>ds   | 3.53<br>E+04 | 2.82E<br>+04* | 3.16E<br>+04  | 2.90E<br>+04* |
| 0.976 | 116.07<br>00 | [M+H]<br>+               | Proline <sup>a</sup>          | Amino<br>acids  | 1.87<br>E+04 | 1.75E<br>+04  | 2.25E<br>+04* | 2.40E<br>+04* |
| 0.990 | 203.14<br>90 | [M+H]<br>+               | N,N-dimethylarginine          | Amino<br>acids  | 1.93<br>E+03 | 1.42E<br>+03  | 1.16E<br>+03* | 1.86E<br>+03  |
| 0.994 | 527.15<br>55 | [M+NH<br>4] <sup>+</sup> | Melezitose <sup>a</sup>       | Sugars          | 3.10<br>E+04 | 3.59E<br>+04* | 3.52E<br>+04* | 3.02E<br>+04  |
| 0.995 | 365.10<br>16 | [M+Na]<br>+              | Melibiose <sup>a</sup>        | Sugars          | 9.67<br>E+03 | 1.35E<br>+04* | 1.19E<br>+04* | 1.07E<br>+04  |
| 0.995 | 162.07<br>63 | [M+H]<br>+               | N-methyl-L-glutamic<br>acid   | Amino<br>acids  | 7.74<br>E+02 | 7.45E<br>+02  | 5.21E<br>+02  | 4.94E<br>+02* |
| 1.054 | 118.08<br>68 | [M+H]<br>+               | Betaine <sup>a</sup>          | Alkaloi<br>ds   | 1.87<br>E+04 | 1.74E<br>+04* | 2.07E<br>+04* | 1.91E<br>+04  |
| 1.188 | 152.05<br>63 | [M+H]<br>+               | Guanine <sup>a</sup>          | Nucleos<br>ides | 4.80<br>E+02 | 7.75E<br>+02* | 5.50E<br>+02  | 4.81E<br>+02  |
| 1.415 | 123.05<br>50 | [M+H]<br>+               | Niacinamide <sup>a</sup>      | Alkaloi<br>ds   | 2.72<br>E+04 | 2.85E<br>+04* | 2.55E<br>+04  | 2.03E<br>+04* |
| 1.539 | 113.03<br>39 | [M+H]<br>+               | Uracil <sup>a</sup>           | Nucleos<br>ides | 3.95<br>E+02 | 1.52E<br>+03* | 6.72E<br>+02  | 3.10E<br>+02  |
| 1.589 | 348.06<br>85 | [M+H]<br>+               | AMP <sup>a</sup>              | Nucleos<br>ides | 5.95<br>E+04 | 5.73E<br>+04  | 6.78E<br>+04* | 6.29E<br>+04  |
| 1.683 | 308.08<br>92 | [M+H]<br>+               | Glutathione <sup>a</sup>      | Amino<br>acids  | 8.95<br>E+03 | 1.48E<br>+04* | 1.13E<br>+04* | 1.30E<br>+04* |
| 1.755 | 123.05<br>51 | [M+H]<br>+               | Nicotinamide <sup>a</sup>     | Alkaloi<br>ds   | 2.74<br>E+04 | 2.73E<br>+04  | 2.40E<br>+04  | 1.93E<br>+04* |
| 1.862 | 180.06<br>79 | [M-H] <sup>-</sup>       | Tyrosine <sup>a</sup>         | Amino<br>acids  | 4.01<br>E+04 | 4.05E<br>+04  | 4.46E<br>+04* | 4.33E<br>+04  |
| 2.060 | 104.04<br>55 | [M+H]<br>+               | Biuret                        | Others          | 5.22<br>E+02 | 2.55E<br>+02* | 5.78E<br>+02  | 3.52E<br>+02* |
| 2.069 | 664.11<br>20 | [M+H]<br>+               | NAD <sup>+</sup> <sup>a</sup> | Nucleos<br>ides | 2.78<br>E+03 | 5.53E<br>+03* | 2.27E<br>+03  | 2.76E<br>+03  |
| 2.102 | 132.10<br>00 | [M+H]<br>+               | Isoleucine <sup>a</sup>       | Amino<br>acids  | 9.84<br>E+03 | 8.85E<br>+03  | 8.59E<br>+03* | 8.69E<br>+03  |

|       |              |                           |                               |                    |              |               |               |               |
|-------|--------------|---------------------------|-------------------------------|--------------------|--------------|---------------|---------------|---------------|
| 2.746 | 250.07<br>14 | [M-H]-                    | Phenylacetylaspatic acid      | Amino acids        | 8.36<br>E+02 | 1.59E<br>+03  | 1.15E<br>+03* | 6.87E<br>+02* |
| 6.138 | 182.04<br>34 | [M-H]-                    | 4-Pyridoxic acid              | Vitamin<br>s       | 3.40<br>E+04 | 3.27E<br>+04  | 3.04E<br>+04  | 2.66E<br>+04* |
| 6.461 | 220.11<br>74 | [M+H]<br>+                | Pantothenic acid <sup>a</sup> | Vitamin<br>s       | 6.70<br>E+02 | 6.63E<br>+02  | 8.50E<br>+02* | 7.27E<br>+02  |
| 6.646 | 312.12<br>56 | [M+H]<br>+                | N2,N2-dimethylguanosine       | Nucleos<br>ides    | 1.63<br>E+03 | 1.72E<br>+03  | 1.88E<br>+03  | 1.22E<br>+03* |
| 6.994 | 367.10<br>13 | [M-H]-                    | 3-Feruloylquinic Acid         | Phenoli<br>c acids | 4.18<br>E+05 | 4.89E<br>+05* | 3.69E<br>+05  | 3.38E<br>+05* |
| 7.112 | 205.09<br>48 | [M-H]-                    | Tryptophan <sup>a</sup>       | Amino<br>acids     | 3.61<br>E+04 | 2.98E<br>+04  | 3.23E<br>+04  | 3.01E<br>+04* |
| 7.649 | 138.05<br>48 | [M+H]<br>+                | 3-Aminobenzoic acid           | Organic<br>acids   | 3.32<br>E+04 | 5.99E<br>+04* | 4.19E<br>+04* | 7.28E<br>+04* |
| 7.689 | 339.10<br>56 | [M+2K<br>-H] <sup>+</sup> | 3-O-coumaroylquinic Acid      | Phenoli<br>c acids | 7.96<br>E+03 | 9.90E<br>+03  | 1.03E<br>+04* | 9.73E<br>+03  |
| 7.729 | 153.01<br>99 | [M-H]-                    | 2,5-Dihydroxybenzoic acid     | Organic<br>acids   | 4.79<br>E+05 | 4.77E<br>+05  | 4.62E<br>+05  | 4.48E<br>+05* |
| 7.743 | 291.08<br>84 | [M+H]<br>+                | Epicatechin <sup>a</sup>      | Flavono<br>ids     | 1.97<br>E+04 | 2.38E<br>+04* | 1.68E<br>+04  | 1.99E<br>+04  |
| 8.268 | 307.17<br>58 | [M+H]<br>+                | Feruloyl agmatine             | Phenoli<br>c acids | 1.24<br>E+03 | 3.22E<br>+03* | 3.99E<br>+02* | 5.53E<br>+02* |
| 8.448 | 377.14<br>48 | [M+H]<br>+                | Riboflavin <sup>a</sup>       | Vitamin<br>s       | 1.59<br>E+03 | 2.21E<br>+03* | 1.33E<br>+03  | 1.27E<br>+03  |
| 8.624 | 121.03<br>02 | [M-H]-                    | 4-Hydroxybenzaldehyde         | Others             | 6.79<br>E+04 | 7.01E<br>+04  | 8.13E<br>+04* | 6.85E<br>+04  |
| 8.666 | 595.16<br>59 | [M+H]<br>+                | Biotin                        | Flavono<br>ids     | 7.64<br>E+04 | 7.46E<br>+04  | 5.60E<br>+04* | 6.22E<br>+04* |
| 8.704 | 609.16<br>68 | [M-H]-                    | Hesperetin 7-O-Rutinoside     | Flavono<br>ids     | 1.55<br>E+06 | 1.35E<br>+06* | 1.21E<br>+06* | 1.23E<br>+06  |
| 8.745 | 563.14<br>25 | [M-H]-                    | Corymboside                   | Flavono<br>ids     | 7.11<br>E+06 | 6.83E<br>+06  | 6.45E<br>+06  | 6.35E<br>+06* |
| 8.845 | 449.10<br>79 | [M+H]<br>+                | homoorientin <sup>a</sup>     | Flavono<br>ids     | 7.43<br>E+05 | 7.37E<br>+05  | 7.10E<br>+05  | 6.02E<br>+05* |
| 8.902 | 449.10<br>36 | [M+H]<br>+                | Isoorientin <sup>a</sup>      | Flavono<br>ids     | 6.82<br>E+05 | 7.30E<br>+05  | 6.88E<br>+05  | 6.08E<br>+05* |
| 8.907 | 565.15<br>61 | [M+H]<br>+                | Schaftoside                   | Flavono<br>ids     | 2.29<br>E+06 | 2.55E<br>+06  | 2.23E<br>+06  | 2.12E<br>+06* |
| 8.947 | 207.01<br>16 | [M-H]-                    | 2-Naphthalenesulfonic acid    | Organic<br>acids   | 1.84<br>E+02 | 2.07E<br>+02  | 1.52E<br>+02  | 1.48E<br>+02* |
| 9.085 | 447.09<br>56 | [M-H]-                    | Luteolin 6-C-glucoside        | Flavono<br>ids     | 7.99<br>E+05 | 5.77E<br>+05  | 7.17E<br>+05* | 6.15E<br>+05* |

|            |              |               |                                          |                    |              |               |               |               |
|------------|--------------|---------------|------------------------------------------|--------------------|--------------|---------------|---------------|---------------|
| 9.157      | 433.10<br>48 | [M+H]<br>+    | Isovitexin                               | Flavono<br>ids     | 2.32<br>E+04 | 2.78E<br>+04* | 2.30E<br>+04  | 2.68E<br>+04  |
| 9.286      | 625.17<br>59 | [M+H]<br>+    | Iscopalin 2-O-<br>glucoside              | Flavono<br>ids     | 6.16<br>E+06 | 6.49E<br>+06  | 5.30E<br>+06* | 5.54E<br>+06* |
| 9.320      | 579.17<br>32 | [M+H]<br>+    | Vitexin 2-O-<br>rhamnoside               | Flavono<br>ids     | 1.29<br>E+04 | 1.70E<br>+04* | 1.20E<br>+04  | 1.55E<br>+04  |
| 9.734      | 479.12<br>27 | [M+H]<br>+    | Isorhamnetin 3-O-<br>glucoside           | Flavono<br>ids     | 3.01<br>E+05 | 3.23E<br>+05  | 2.53E<br>+05  | 2.27E<br>+05* |
| 9.874      | 491.11<br>59 | [M-H]-        | Tricin 5-glucoside                       | Flavono<br>ids     | 4.15<br>E+06 | 3.76E<br>+06  | 3.59E<br>+06  | 3.56E<br>+06* |
| 9.925      | 463.11<br>79 | [M+H]<br>+    | Hispidulin 4-glucoside                   | Flavono<br>ids     | 6.14<br>E+05 | 5.83E<br>+05  | 8.23E<br>+05* | 4.78E<br>+05* |
| 10.01<br>7 | 579.16<br>63 | [M+H]<br>+    | Apigenin 7-O-<br>neohesperidoside        | Flavono<br>ids     | 9.77<br>E+04 | 8.05E<br>+04  | 6.04E<br>+04* | 7.11E<br>+04* |
| 10.15<br>5 | 721.21<br>23 | [M+FA<br>-H]- | Icariin                                  | Flavono<br>ids     | 1.05<br>E+05 | 8.30E<br>+04* | 6.61E<br>+04* | 9.28E<br>+04  |
| 10.29<br>0 | 431.09<br>78 | [M-H]-        | Genistin <sup>a</sup>                    | Flavono<br>ids     | 3.73<br>E+04 | 3.31E<br>+04  | 2.73E<br>+04* | 2.97E<br>+04* |
| 10.30<br>7 | 639.19<br>21 | [M+H]<br>+    | Demethoxycentaureidi<br>n 7-O-rutinoside | Flavono<br>ids     | 6.28<br>E+06 | 7.28E<br>+06* | 5.80E<br>+06* | 6.47E<br>+06  |
| 10.49<br>7 | 144.04<br>60 | [M-H]-        | Indole-3-<br>carboxaldehyde <sup>a</sup> | Others             | 1.02<br>E+04 | 1.19E<br>+04  | 1.07E<br>+04  | 9.07E<br>+03* |
| 10.54<br>9 | 757.20<br>97 | [M]+          | Cyanidin 3-(2G-<br>glucosylrutinoside)   | Flavono<br>ids     | 7.59<br>E+04 | 7.10E<br>+04  | 6.64E<br>+04* | 5.62E<br>+04* |
| 10.63<br>6 | 463.12<br>09 | [M]+          | Peonidin 3-O-<br>glucoside               | Flavono<br>ids     | 4.90<br>E+05 | 4.13E<br>+05* | 3.60E<br>+05* | 3.83E<br>+05* |
| 10.72<br>6 | 515.15<br>21 | [M+H]<br>+    | Globularin                               | Others             | 2.92<br>E+05 | 2.85E<br>+05  | 2.63E<br>+05* | 3.00E<br>+05  |
| 11.53<br>6 | 314.13<br>67 | [M+H]<br>+    | feruloyltyramine                         | Phenoli<br>c acids | 1.74<br>E+04 | 1.20E<br>+04* | 1.30E<br>+04* | 1.44E<br>+04* |
| 11.75<br>8 | 257.07<br>94 | [M+H]<br>+    | Glycyrrhizin                             | Flavono<br>ids     | 4.58<br>E+03 | 4.89E<br>+03  | 5.08E<br>+03  | 5.76E<br>+03* |
| 13.05<br>5 | 331.08<br>17 | [M+H]<br>+    | Tricin                                   | Flavono<br>ids     | 1.01<br>E+06 | 1.26E<br>+06* | 8.49E<br>+05* | 1.27E<br>+06* |
| 16.77<br>8 | 483.26<br>26 | [M-H]-        | LPG 16:0                                 | Lipids             | 1.41<br>E+05 | 1.24E<br>+05  | 1.77E<br>+05* | 1.20E<br>+05  |
| 17.16<br>0 | 308.22<br>18 | [M+H]<br>+    | Dihydrocapsaicin                         | Others             | 3.40<br>E+03 | 3.50E<br>+03  | 3.57E<br>+03  | 3.87E<br>+03* |
| 17.18<br>0 | 325.18<br>45 | [M-H]-        | Hydroquinidine                           | Others             | 1.81<br>E+05 | 2.09E<br>+05  | 1.92E<br>+05  | 2.32E<br>+05* |
| 17.65<br>8 | 478.29<br>07 | [M+H]<br>+    | LPE 18:2                                 | Lipids             | 1.58<br>E+05 | 1.58E<br>+05  | 1.99E<br>+05* | 1.50E<br>+05  |

|            |              |                                             |                                          |        |              |               |               |               |
|------------|--------------|---------------------------------------------|------------------------------------------|--------|--------------|---------------|---------------|---------------|
| 17.99<br>1 | 415.20<br>55 | [M-<br>H <sub>2</sub> O+H<br>] <sup>+</sup> | Gelomulide N                             | Others | 3.94<br>E+02 | 7.18E<br>+02* | 7.59E<br>+02* | 7.17E<br>+02  |
| 18.56<br>8 | 454.29<br>11 | [M+H]<br>+                                  | LPE 16:0                                 | Lipids | 9.60<br>E+04 | 1.12E<br>+05* | 1.09E<br>+05* | 9.69E<br>+04  |
| 19.10<br>0 | 480.30<br>62 | [M-H]-                                      | LPE 18:1                                 | Lipids | 7.33<br>E+03 | 8.97E<br>+03* | 1.14E<br>+04* | 7.90E<br>+03* |
| 19.21<br>3 | 522.35<br>42 | [M+H]<br>+                                  | LPC 18:1                                 | Lipids | 9.81<br>E+04 | 1.20E<br>+05* | 1.47E<br>+05* | 1.03E<br>+05  |
| 19.26<br>4 | 247.16<br>35 | [M-H]-                                      | FA 16:4                                  | Lipids | 3.08<br>E+04 | 3.45E<br>+04* | 3.50E<br>+04* | 3.24E<br>+04  |
| 19.53<br>0 | 468.31<br>01 | [M+H]<br>+                                  | LPE 17:0                                 | Lipids | 2.67<br>E+03 | 3.48E<br>+03  | 3.32E<br>+03* | 3.49E<br>+03* |
| 20.06<br>7 | 510.35<br>86 | [M+H]<br>+                                  | LPC 17:0                                 | Lipids | 3.52<br>E+04 | 3.59E<br>+04  | 4.63E<br>+04* | 3.93E<br>+04  |
| 21.56<br>9 | 277.21<br>96 | [M+H]<br>+                                  | FA 18:3 (Linolenic<br>acid) <sup>a</sup> | Lipids | 8.76<br>E+03 | 1.25E<br>+04* | 1.20E<br>+04* | 1.15E<br>+04* |
| 21.64<br>0 | 267.22<br>05 | [M-H]-                                      | FA 17:1                                  | Lipids | 3.03<br>E+03 | 2.66E<br>+03  | 2.98E<br>+03  | 4.03E<br>+03* |
| 22.03<br>9 | 728.52<br>50 | [M-H]-                                      | PE (O-18:0/18:2)                         | Lipids | 4.12<br>E+03 | 3.62E<br>+03  | 2.43E<br>+03* | 3.51E<br>+03  |
| 22.27<br>3 | 301.21<br>13 | [M-H]-                                      | FA 20:5                                  | Lipids | 3.47<br>E+03 | 1.95E<br>+03* | 1.19E<br>+04* | 1.56E<br>+04* |
| 22.68<br>0 | 855.49<br>13 | [M-H]-                                      | PI (18:2/18:3)                           | Lipids | 1.26<br>E+05 | 1.42E<br>+05* | 1.59E<br>+05* | 1.50E<br>+05  |
| 22.75<br>4 | 765.44<br>63 | [M-H]-                                      | PG (18:3/18:3)                           | Lipids | 1.21<br>E+05 | 1.16E<br>+05  | 1.23E<br>+05  | 1.38E<br>+05* |
| 22.94<br>1 | 317.24<br>02 | [M-H]-                                      | FA 21:4                                  | Lipids | 4.18<br>E+02 | 3.22E<br>+02  | 4.27E<br>+02  | 3.30E<br>+02* |
| 23.04<br>1 | 738.49<br>48 | [M-H]-                                      | PE (18:2/18:2)                           | Lipids | 5.00<br>E+05 | 4.45E<br>+05* | 5.58E<br>+05* | 5.92E<br>+05* |
| 23.14<br>5 | 281.24<br>61 | [M+H]<br>+                                  | FA 18:2 (Linoleic<br>acid) <sup>a</sup>  | Lipids | 1.86<br>E+06 | 2.63E<br>+06* | 2.86E<br>+06* | 3.16E<br>+06* |
| 23.19<br>8 | 831.48<br>82 | [M-H]-                                      | PI (16:0/18:3)                           | Lipids | 9.52<br>E+04 | 1.13E<br>+05* | 1.23E<br>+05* | 1.21E<br>+05* |
| 23.24<br>1 | 857.49<br>95 | [M-H]-                                      | PI (18:2/18:2)                           | Lipids | 2.42<br>E+05 | 2.94E<br>+05* | 4.35E<br>+05* | 4.42E<br>+05* |
| 23.39<br>9 | 729.45<br>94 | [M-H]-                                      | PG (15:0/18:3)                           | Lipids | 3.82<br>E+05 | 4.26E<br>+05  | 4.32E<br>+05* | 4.41E<br>+05* |
| 23.46<br>9 | 307.25<br>73 | [M-H]-                                      | FA 20:2                                  | Lipids | 3.21<br>E+03 | 3.38E<br>+03  | 4.17E<br>+03* | 5.94E<br>+03  |

|            |              |        |                   |        |              |               |               |               |
|------------|--------------|--------|-------------------|--------|--------------|---------------|---------------|---------------|
| 23.51<br>6 | 705.43<br>63 | [M-H]- | PMeOH (18:3/18:3) | Lipids | 3.39<br>E+05 | 4.71E<br>+05* | 2.60E<br>+05* | 2.91E<br>+05  |
| 23.55<br>4 | 269.25<br>09 | [M-H]- | FA 17:0           | Lipids | 2.51<br>E+04 | 2.57E<br>+04  | 2.78E<br>+04* | 2.52E<br>+04  |
| 23.77<br>5 | 833.53<br>86 | [M-H]- | PI (16:0/18:2)    | Lipids | 6.34<br>E+06 | 7.24E<br>+06  | 1.06E<br>+07* | 1.06E<br>+07* |
| 23.79<br>5 | 655.42<br>62 | [M-H]- | PMeOH (14:0/18:3) | Lipids | 2.70<br>E+04 | 3.75E<br>+04* | 1.98E<br>+04* | 2.14E<br>+04* |
| 23.82<br>7 | 743.46<br>89 | [M-H]- | PG (16:0/18:3)    | Lipids | 4.21<br>E+07 | 4.57E<br>+07* | 4.65E<br>+07* | 4.88E<br>+07* |
| 23.85<br>9 | 769.48<br>81 | [M-H]- | PG (18:2/18:2)    | Lipids | 1.09<br>E+06 | 1.18E<br>+06* | 1.29E<br>+06* | 1.23E<br>+06* |
| 23.92<br>2 | 859.52<br>03 | [M-H]- | PI (18:1/18:2)    | Lipids | 9.83<br>E+04 | 1.15E<br>+05* | 2.05E<br>+05* | 2.04E<br>+05* |
| 23.98<br>5 | 731.51<br>20 | [M-H]- | PG (15:0/18:2)    | Lipids | 7.98<br>E+05 | 8.30E<br>+05  | 8.84E<br>+05* | 9.62E<br>+05* |
| 23.98<br>5 | 753.49<br>36 | [M-H]- | PG (O-18:3/18:2)  | Lipids | 2.89<br>E+04 | 3.44E<br>+04* | 3.96E<br>+04* | 4.39E<br>+04* |
| 24.13<br>3 | 672.50<br>64 | [M-H]- | PE (O-14:0/18:2)  | Lipids | 1.81<br>E+04 | 1.77E<br>+04  | 1.25E<br>+04* | 1.53E<br>+04* |
| 24.15<br>5 | 707.45<br>47 | [M-H]- | PMeOH (18:2/18:3) | Lipids | 1.82<br>E+06 | 2.44E<br>+06* | 1.38E<br>+06* | 1.42E<br>+06* |
| 24.31<br>3 | 719.46<br>50 | [M-H]- | PG (16:0/16:1)    | Lipids | 3.14<br>E+07 | 3.35E<br>+07  | 3.68E<br>+07  | 3.92E<br>+07* |
| 24.34<br>5 | 757.50<br>89 | [M-H]- | PG (17:0/18:3)    | Lipids | 2.80<br>E+05 | 3.06E<br>+05  | 4.29E<br>+05* | 4.82E<br>+05* |
| 24.34<br>5 | 669.44<br>41 | [M-H]- | PMeOH (15:0/18:3) | Lipids | 1.20<br>E+05 | 1.70E<br>+05* | 1.15E<br>+05  | 1.24E<br>+05  |
| 24.52<br>0 | 657.44<br>00 | [M-H]- | PMeOH (14:0/18:2) | Lipids | 2.04<br>E+04 | 2.99E<br>+04* | 2.20E<br>+04  | 2.17E<br>+04  |
| 24.52<br>4 | 847.52<br>61 | [M-H]- | PI (17:0/18:2)    | Lipids | 7.80<br>E+04 | 7.31E<br>+04  | 1.50E<br>+05* | 1.84E<br>+05* |
| 24.59<br>8 | 745.49<br>14 | [M-H]- | PG (16:0/18:2)    | Lipids | 2.23<br>E+07 | 2.75E<br>+07* | 2.93E<br>+07* | 3.10E<br>+07* |
| 24.72<br>5 | 771.50<br>64 | [M-H]- | PG (18:1/18:2)    | Lipids | 1.60<br>E+04 | 1.97E<br>+04  | 3.06E<br>+04* | 3.28E<br>+04* |
| 25.00<br>5 | 309.27<br>40 | [M-H]- | FA 20:1           | Lipids | 5.60<br>E+04 | 6.04E<br>+04* | 6.76E<br>+04* | 7.64E<br>+04  |

<sup>a</sup> Confirmed by the standard database; \* metabolites with significant differences compared to the control.
